# Supplementary material for: Increase in Cellulose Accumulation and Improvement of Saccharification by Overexpression of Arabinofuranosidase in Rice
Source: PubMed Central journal article supplement (PMC3817243; doi:10.1371/journal.pone.0078269), 2013-11-04
Supplement: pone.0078269.s001.pdf [file pone.0078269.s001.pdf]

**Increase in cellulose accumulation and improvement of saccharification by overexpression of arabinofuranosidase in rice**

Minako Sumiyoshi, Atsuko Nakamura, Hidemitsu Nakamura, Makoto Hakata, Hiroaki Ichikawa, Hirohiko Hirochika, Tadashi Ishii, Shinobu Satoh and Hiroaki Iwai

**A**

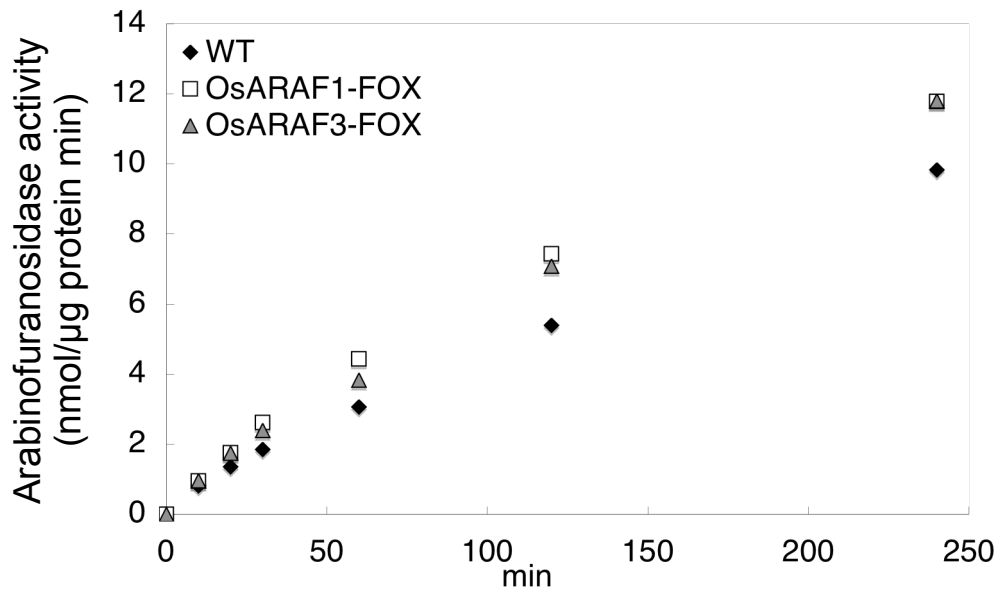

**B**

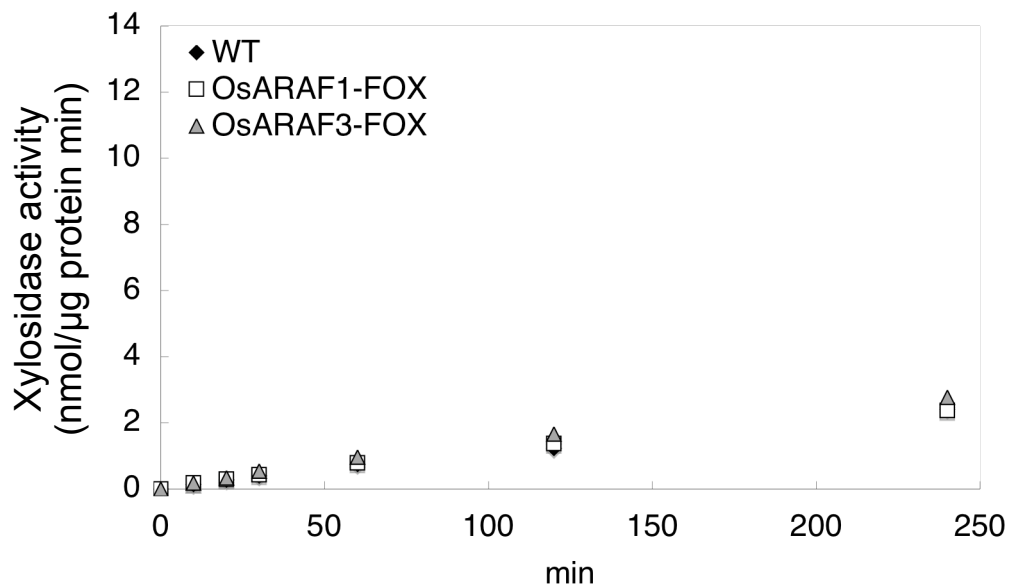

**Figure S1** Enzyme activity in WT, OsARAF1-FOX and OsARAF3-FOX.
